# Supplementary material for: Practical Recommendations for Navigating Digital Tools in Hospitals: Qualitative Interview Study
Source: JMIR Med Educ. 2024 Nov 27;10:e60031. doi: 10.2196/60031 (PMC11635325; doi:10.2196/60031)

**Practical Recommendations for Navigating Digital Tools in Hospitals: Qualitative Interview Study**

Marie Wosny1,2, Livia Maria Strasser1, Simone Kraehenmann1,3, Janna Hastings1,2,4

1School of Medicine, University of St. Gallen (HSG), St Gallen, Switzerland

2Institute for Implementation Science in Health Care, University of Zurich (UZH), Zurich, Switzerland

3Clinic for Internal Medicine, Family Medicine, and Emergency Medicine, Kantonsspital St.Gallen (KSSG), St. Gallen, Switzerland

4 Swiss Institute of Bioinformatics (SIB), Switzerland

**Supplementary Appendix 2**

## Coding tree illustrating the development of themes through inductive thematic analysis


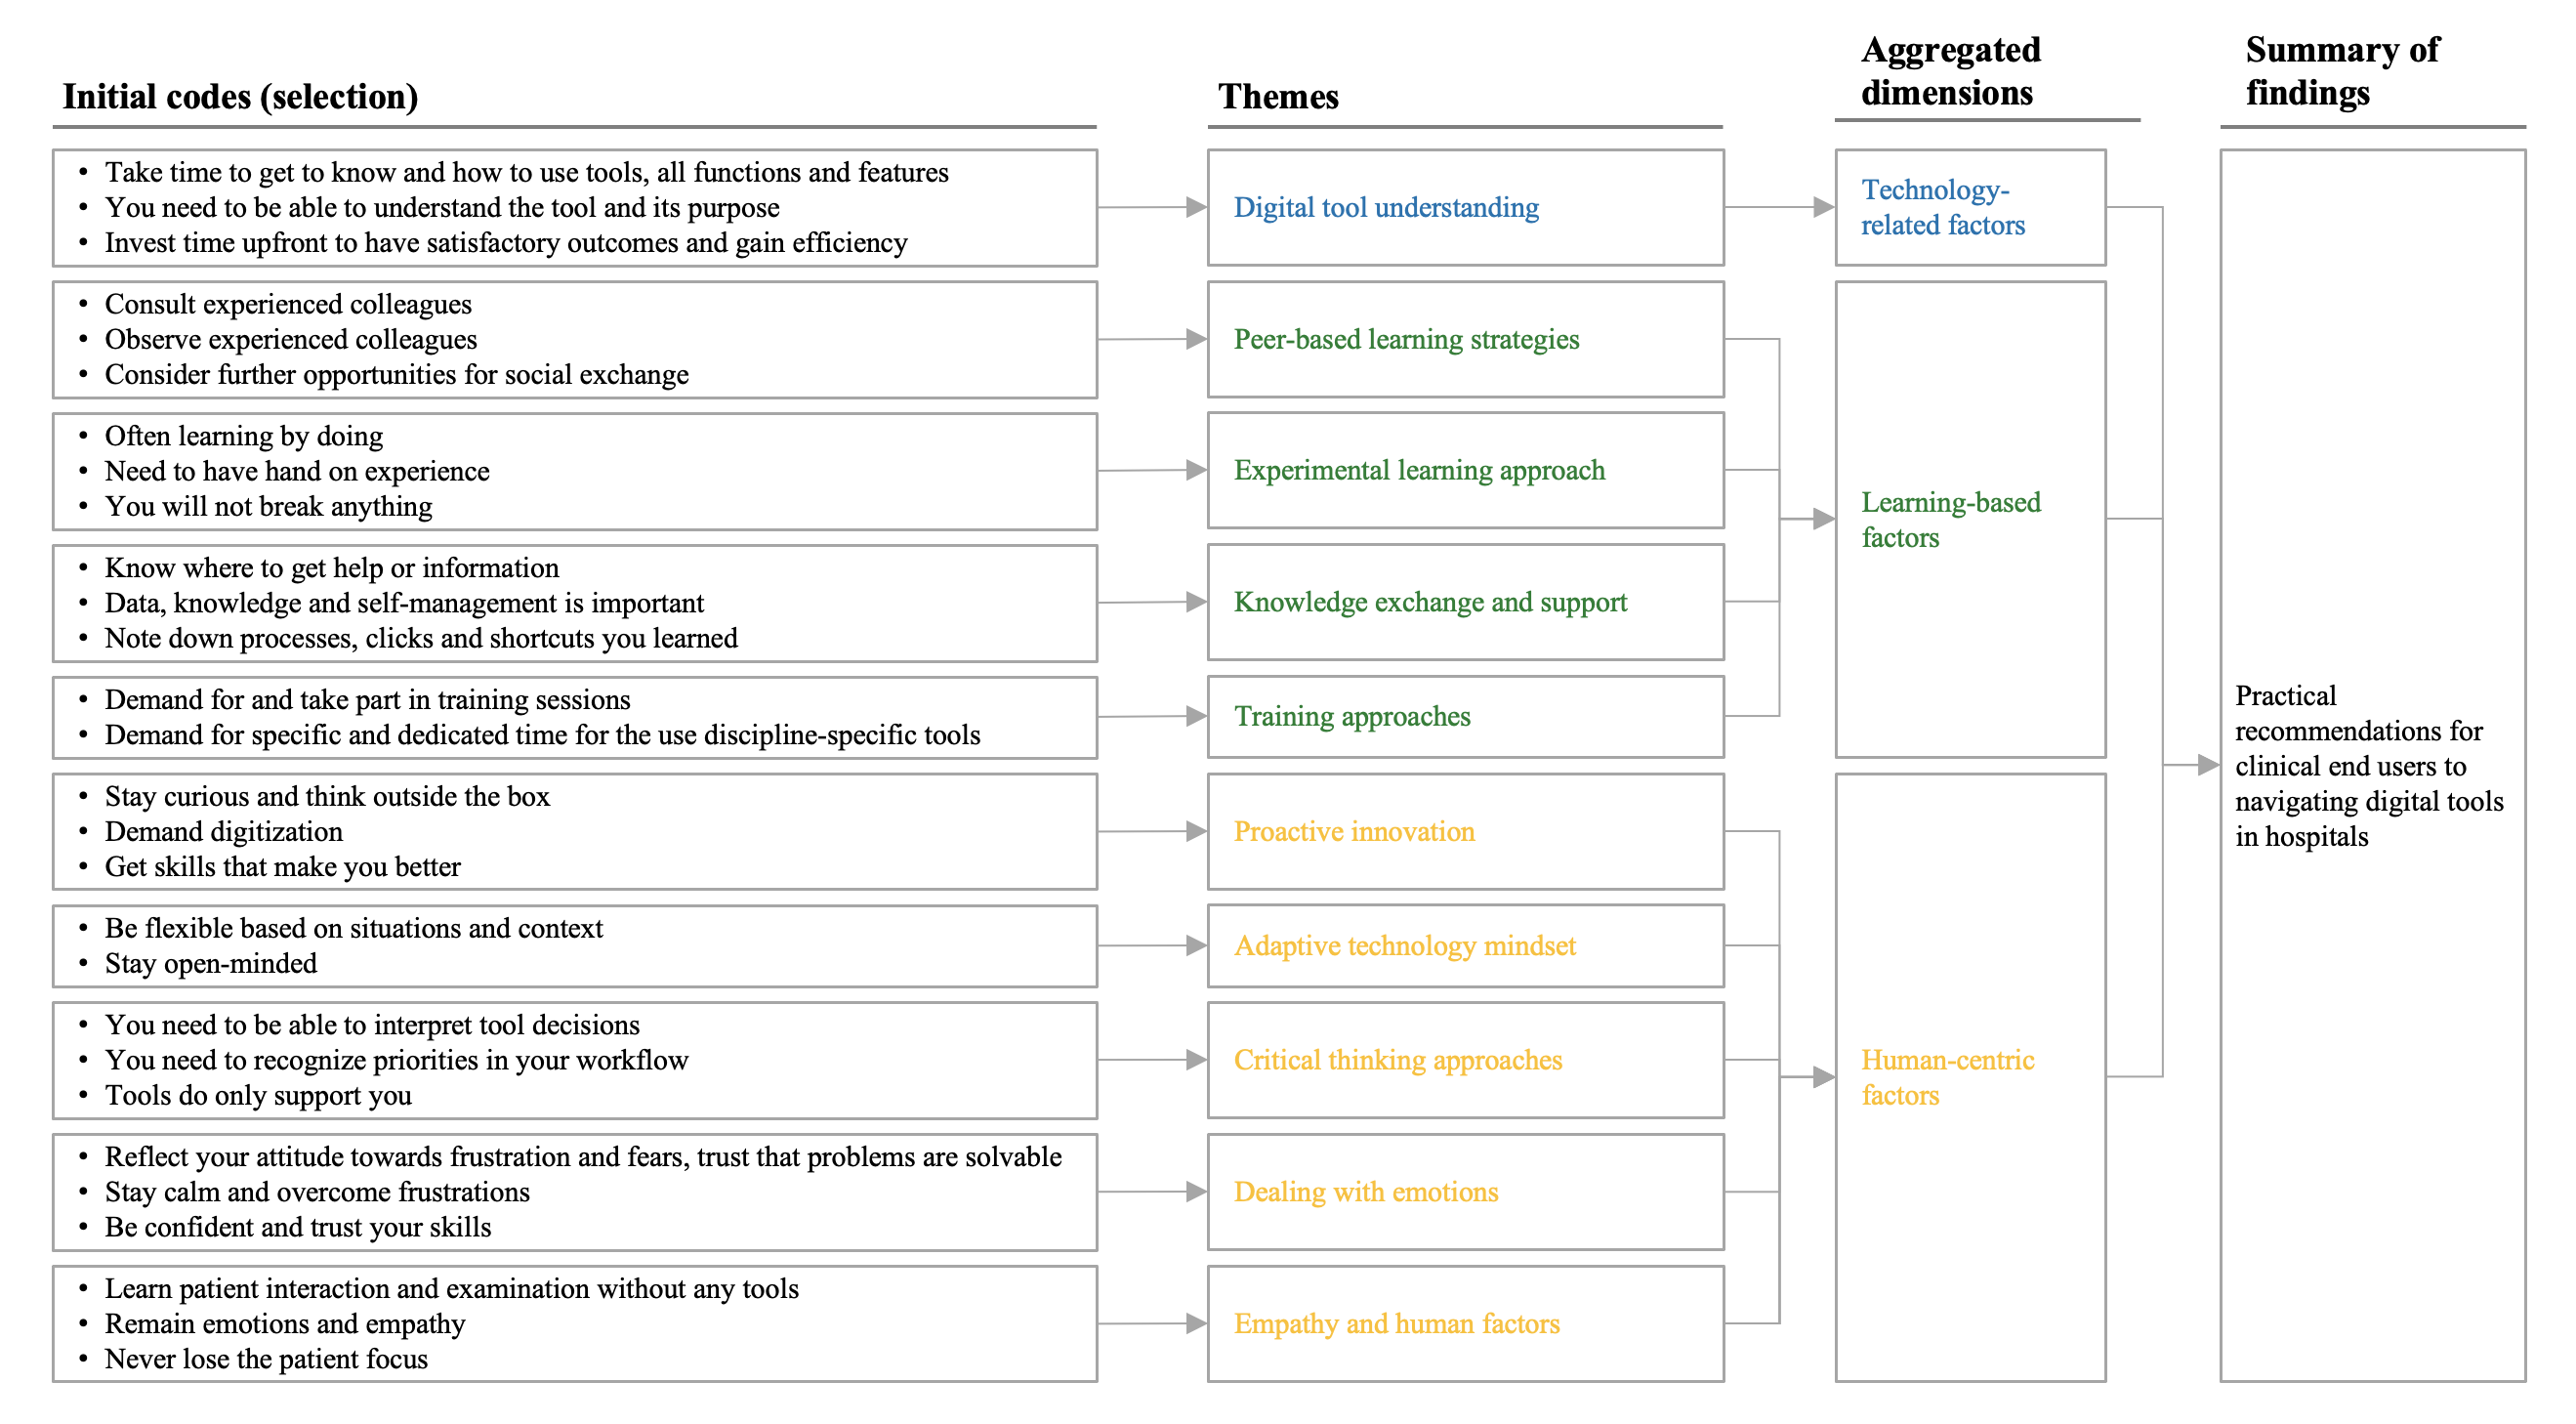

Supplement: Multimedia Appendix 2 [file mededu_v10i1e60031_app2.docx]
